# Supplementary material for: Switching Patients with Type 1 Diabetes to Insulin Degludec from Other Basal Insulins: Real-World Data of Effectiveness and Safety
Source: Springer Nature journal article supplement (doi:10.1007/s13300-019-00722-y), 2019-11-09
Supplement: MOESM1 [file 17370390]

**Table S1. Proportions of available data (%) at each visit.**

|  | **Visit** | | |
| --- | --- | --- | --- |
| **Variable** | **Baseline (T0)** | **Follow-up 1 (T1)** | **Follow-up 2 (T2)** |
| No. group | 195 | 195 | 195 |
| Sex (%) | 100 | - | - |
| Age (%) | 100 | - | - |
| Diabetes duration (%) | 99.5 | - | - |
| Chronic kidney disease (%) | 100 | - | - |
| Previous cardiovascular event (%) | 100 | - | - |
| Previous basal insulin daily dose (%) | 97.9 | - | - |
| Previous basal insulin, type (%) | 98.9 | - | - |
| Degludec mean dose (%) | 100 | 92.8 | 74.8 |
| Treatment with short-acting insulin (%) | 95.9 | - | - |
| Short-acting insulin daily dose (%) | 97.4 | 90.7 | 71.8 |
| Premix insulin (%) | 100 | - | - |
| HbA1c (%) | 97.9 | 86.1 | 71.3 |
| Body Mass Index (%) | 92.3 | - | - |
| HBGI | 43.1 | 39.0 | 32.3 |
| LBGI | 40.5 | 37.9 | 31.3 |
| Weight (%) | 96.9 | 89.2 | 66.7 |
| Fasting blood glucose (FBG) (%) | 87.7 | 82.6 | 64.6 |
| Post-prandial glucose (PPG) (%) | 66.1 | 58.5 | 45.6 |
| Standard deviation of mean blood glucose (%) | 65.6 | 61.5 | 49.7 |
